# Supplementary material for: Bioreducible amphiphilic block copolymers based on PCL and glycopolypeptide as multifunctional theranostic nanocarriers for drug delivery and MR imaging
Source: Royal Society of Chemistry journal article supplement (doi:10.1039/c7ra01440f), 2017-01-01
Supplement: c7ra01440f1.pdf [file c7ra01440f1.pdf]

Supporting information for:

Bioreducible amphiphilic block copolymers based on PCL and glycopolypeptide  
as multifunctional theranostic nanocarriers for drug delivery and MR imaging

Hui-Kang Yang<sup>a,1</sup>, Jun-Fang Bao<sup>a,1</sup>, Lei Mo<sup>a,1</sup>, Rui-Meng Yang<sup>a</sup>, Xiang-  
Dong Xu<sup>a</sup>, Wen-Jie Tang<sup>a</sup>, Jian-Tao Lin<sup>b</sup>, Guan-Hai Wang<sup>b</sup>, Li-Ming  
Zhang<sup>c,\*</sup>, Xin-Qing Jiang<sup>a,\*</sup>

<sup>a</sup>Department of Radiology, Guangzhou First People's Hospital, Guangzhou Medical University,  
Guangzhou 510180, China

<sup>b</sup>Dongguan Scientific Research Center, Guangdong Medical University, Dongguan 523808, China

<sup>c</sup>School of Materials Science and Engineering, Sun Yat-sen University, Guangzhou 510275, China

Table of contents :

|                                                        |       |
|--------------------------------------------------------|-------|
| 1. <i>In vitro</i> lectin recognition bioactivity..... | pg S2 |
| 2. Fluorescence microscopic images.....                | pg S2 |
| 3. Flow cytometry assays.....                          | pg S3 |

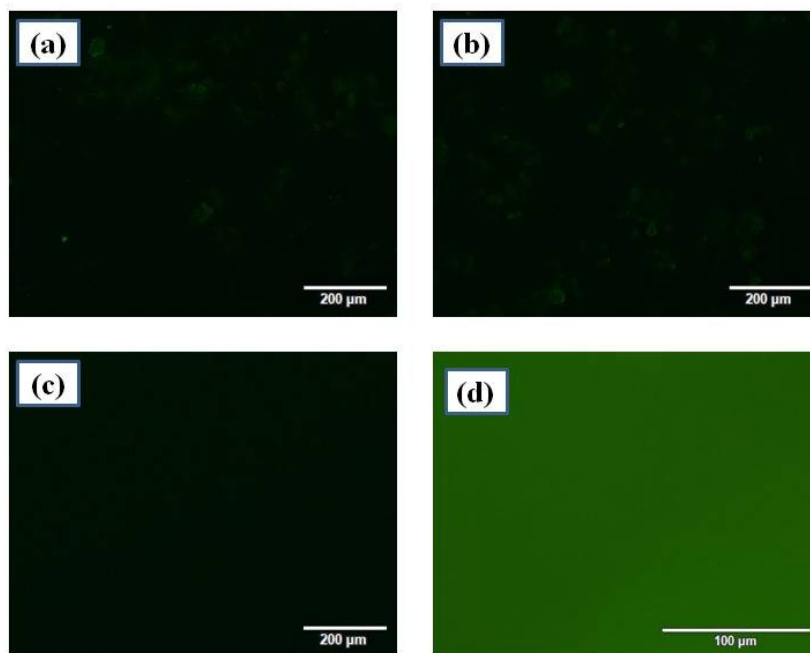

Figure S1. Inverted fluorescence microscope images of cast films of PCL<sub>37</sub>-SS-PGluGal<sub>10</sub>/FITC (a), PCL<sub>37</sub>-SS-PGluLac<sub>10</sub>/FITC (b), PCL<sub>37</sub>-SS-PAELG/LEC-FITC (c) and PCL<sub>37</sub>-SS-PGluGal<sub>10</sub>/LEC-FITC (d).

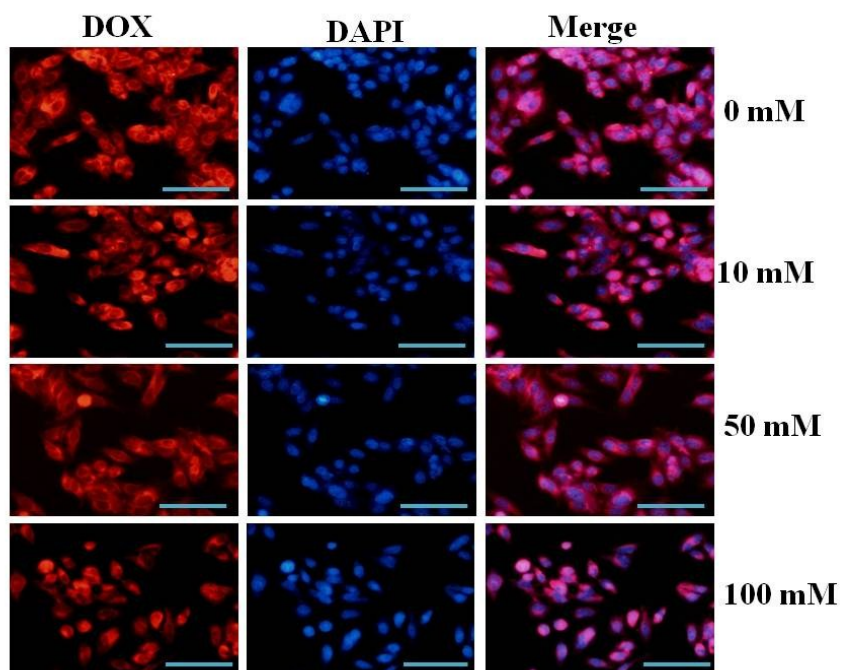

Figure S2. Galactose competitive inhibition experiments. Fluorescence microscopic images of HepG2 cells pretreated with DOX-loaded micelles (DOX concentration 5  $\mu\text{g mL}^{-1}$ ) under galactose of various concentration. Scale bars represent 100  $\mu\text{m}$  in all images.

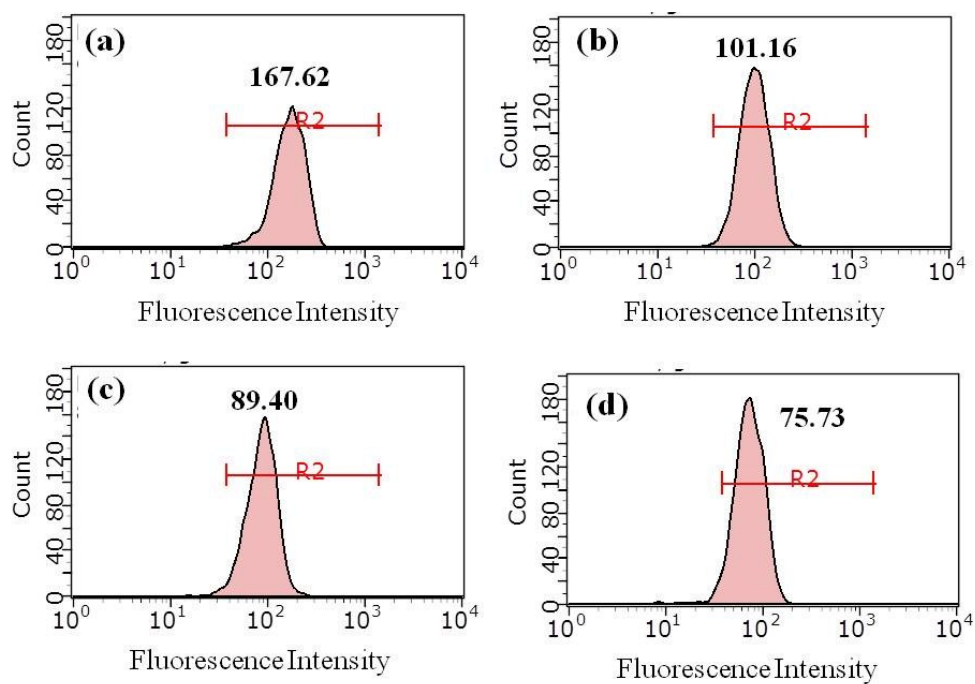

Figure S3. Galactose competitive inhibition experiments. Flow cytometry assays of HepG2 cells pretreated with DOX-loaded micelles (DOX concentration  $5 \mu\text{g mL}^{-1}$ ) under galactose of various concentration, (a) 0 mM, (b) 10mM, (c) 50 mM and (d) 100mM.
